# Supplementary material for: Assembly of reduced graphene oxides into a three-dimensional porous structure via confinement within robust cellulose oligomer networks
Source: Royal Society of Chemistry journal article supplement (doi:10.1039/c9ra08318a), 2019-01-01
Supplement: c9ra08318a1.pdf [file c9ra08318a1.pdf]

Supplementary information

**Assembly of reduced graphene oxides into a three-dimensional porous structure via confinement within robust cellulose oligomer networks**

Yuuki Hata,<sup>a</sup> Yoshitaka Saito,<sup>b</sup> Toshiki Sawada,<sup>ac</sup> Hidetoshi Matsumoto<sup>b</sup> and Takeshi Serizawa<sup>\*a</sup>

*<sup>a</sup>Department of Chemical Science and Engineering and <sup>b</sup>Department of Materials Science and Engineering, School of Materials and Chemical Technology, Tokyo Institute of Technology, 2-12-1 Ookayama, Meguro-ku, Tokyo 152-8550, Japan. E-mail: serizawa@polymer.titech.ac.jp*

*<sup>c</sup>Precursory Research for Embryonic Science and Technology (PRESTO), Japan Science and Technology Agency (JST), 4-1-8 Honcho, Kawaguchi-shi, Saitama 332-0012, Japan*

| Table of Contents                                                                                                     | Page |
|-----------------------------------------------------------------------------------------------------------------------|------|
| <b>Fig. S1</b> AFM images of the raw GOs.                                                                             | S3   |
| <b>Fig. S2</b> Photographs of GO dispersions after incubation at 60 °C for 3 d at various pHs.                        | S3   |
| <b>Fig. S3</b> <sup>1</sup> H NMR spectrum of the cellulose oligomers.                                                | S4   |
| <b>Fig. S4</b> ATR-FTIR absorption spectrum of the products.                                                          | S4   |
| <b>Fig. S5</b> AFM image of the mechanically crushed nanoribbons.                                                     | S5   |
| <b>Fig. S6</b> Photographs of the hybrid gels with 1 mg mL <sup>-1</sup> rGO before and after the reduction reaction. | S5   |
| <b>Fig. S7</b> Mass spectra of cellulose oligomers before and after the reduction reaction.                           | S6   |
| <b>Fig. S8</b> Schematic illustration of the two-electrode system for electrochemical measurements.                   | S6   |
| <b>Fig. S9</b> Cyclic voltammograms of the rGO gels produced via only once reduction reaction.                        | S7   |
| <b>Fig. S10</b> Charge/discharge curves of the rGO gels.                                                              | S7   |
| <b>Table S1</b> The specific capacitance values of the rGO gels                                                       | S7   |
| <b>Fig. S11</b> Cyclic performance and coulombic efficiency of the rGO gels.                                          | S8   |
| <b>Reference</b>                                                                                                      | S8   |

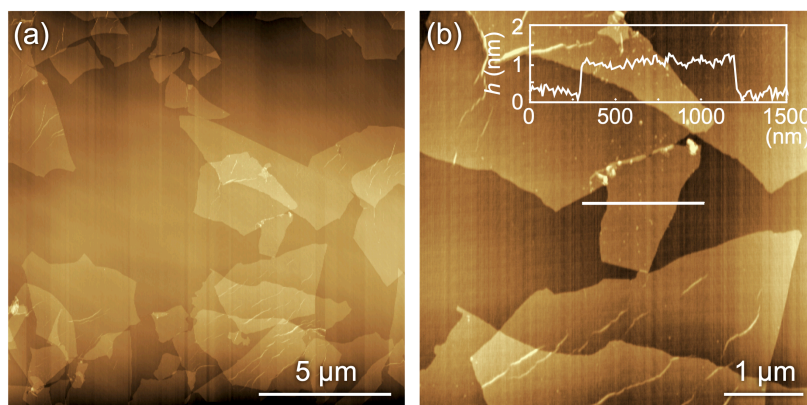

**Fig. S1** Atomic force microscopy (AFM) images of the raw graphene oxides (GOs). Inset in (b) is a cross-section.

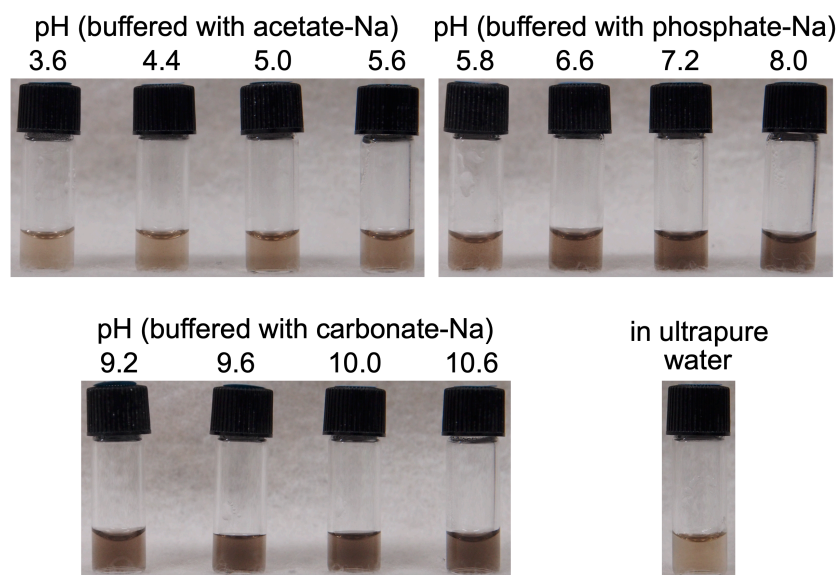

**Fig. S2** Photographs of GO dispersions after incubation at 60 °C for 3 d at various pHs. Concentrations of GOs and buffer species were 0.1 mg mL<sup>-1</sup> and 0.1 M, respectively. The photographs were taken just after redispersion of GOs by pipetting.

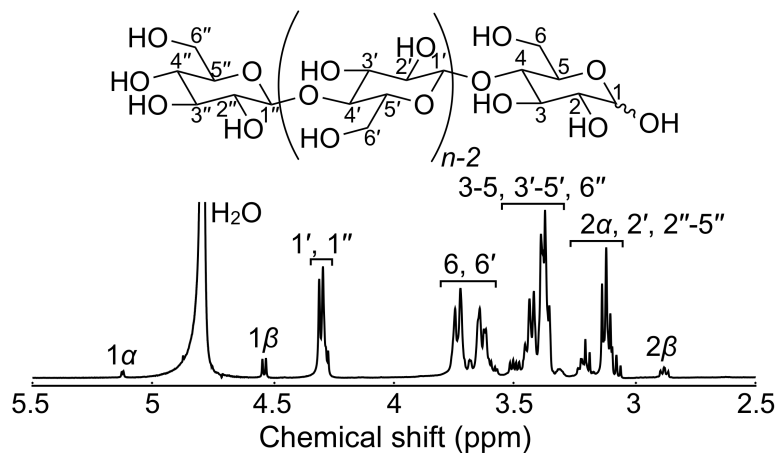

**Fig. S3** <sup>1</sup>H NMR spectrum of the cellulose oligomers synthesized in 4 mg mL<sup>-1</sup> of GO dispersions.

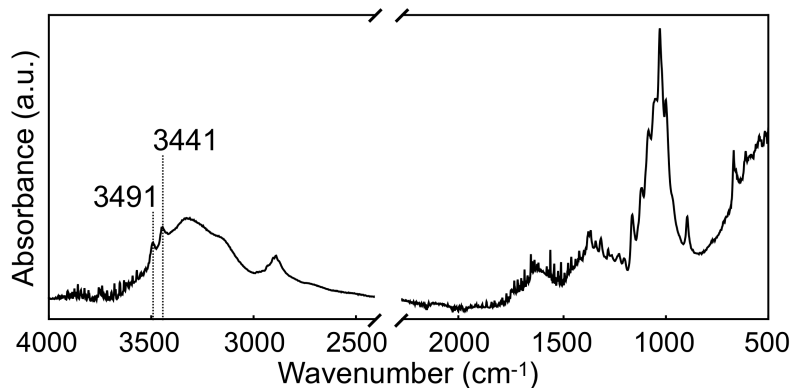

**Fig. S4** Attenuated total reflection-Fourier transform infrared (ATR-FTIR) absorption spectrum of the products. The spectrum showed two characteristic peaks for the intrachain hydrogen-bonded hydroxyl groups in the cellulose II allomorph at approximately 3441 and 3491 cm<sup>-1</sup>.<sup>1</sup>

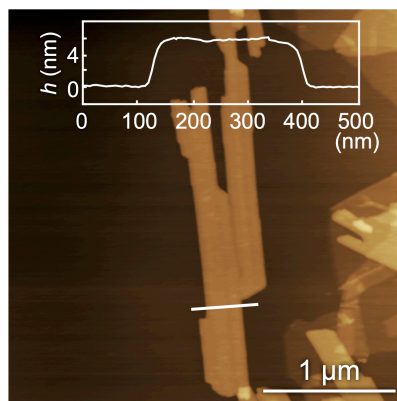

**Fig. S5** AFM image of the mechanically crushed nanoribbons. Inset is a cross-section.

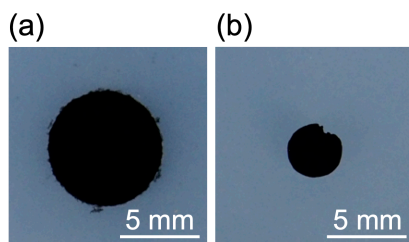

**Fig. S6** Photographs of the hybrid gels with  $1 \text{ mg mL}^{-1}$  reduced GO (rGO) (a) before and (b) after the reduction reaction by hydrogen iodide.

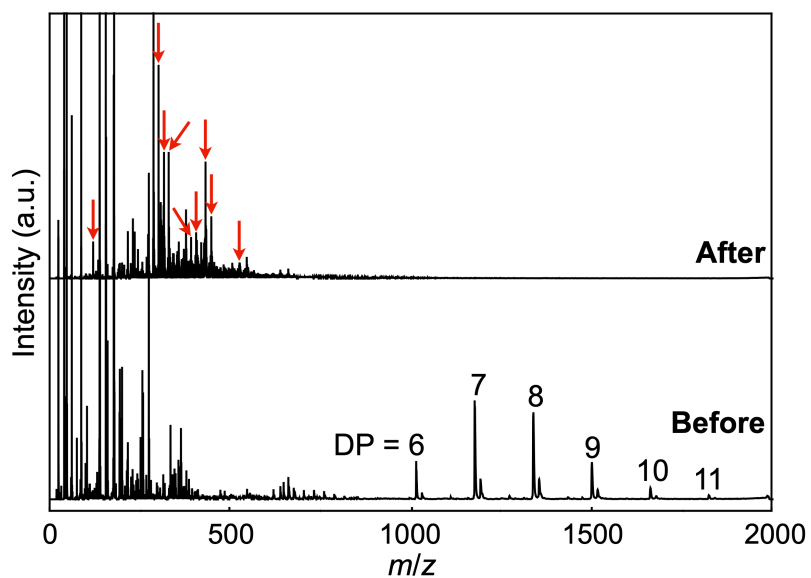

**Fig. S7** Matrix-assisted laser desorption/ionization time-of-flight mass spectra of cellulose oligomers before and after the reduction reaction. The numbers above the peaks denote the degree of polymerization (DP) values of the cellulose oligomers. The red arrows indicate newly emerged peaks after the reduction reaction.

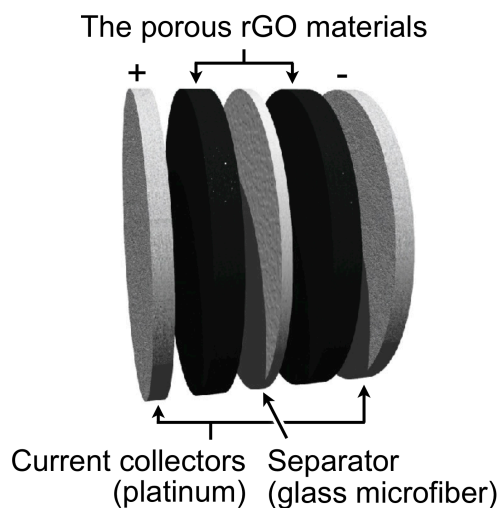

**Fig. S8** Schematic illustration of the two-electrode system for electrochemical measurements.

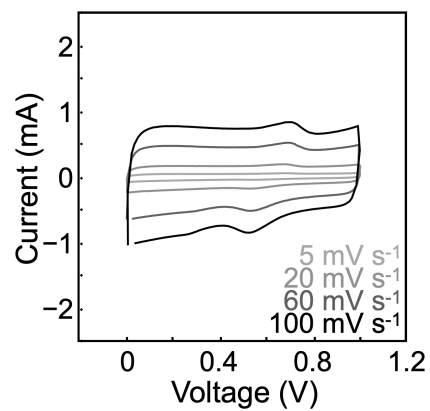

**Fig. S9** Cyclic voltammograms of the rGO gels produced via only once reduction reaction.

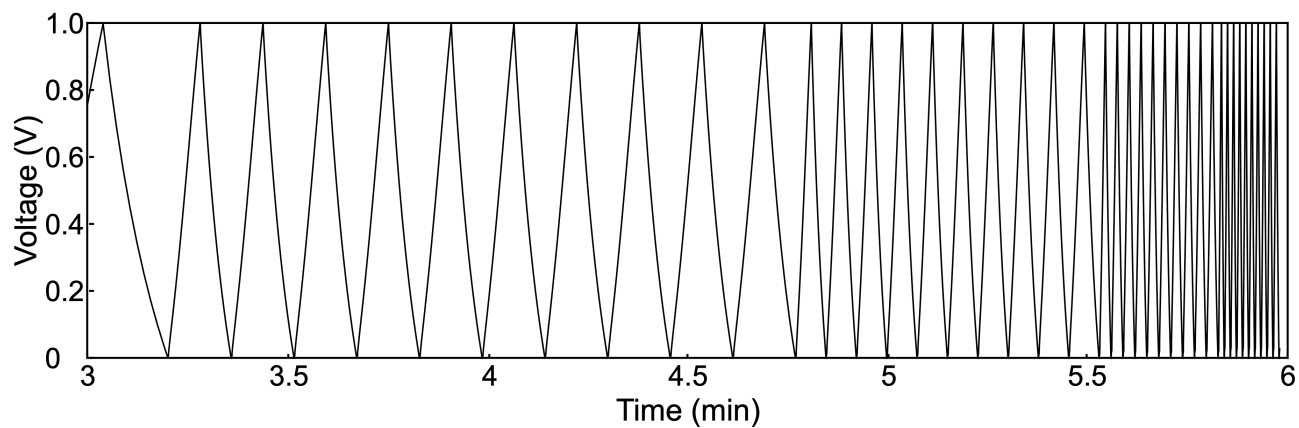

**Fig. S10** Charge/discharge curves of the rGO gels after 3 min.

**Table S1** The specific capacitance values of the rGO gels

| Current density<br>(A g <sup>-1</sup> )      | 5        | 10      | 20     | 50     | 100    |
|----------------------------------------------|----------|---------|--------|--------|--------|
| Specific capacitance<br>(F g <sup>-1</sup> ) | 111 ± 10 | 101 ± 9 | 96 ± 9 | 89 ± 8 | 83 ± 7 |

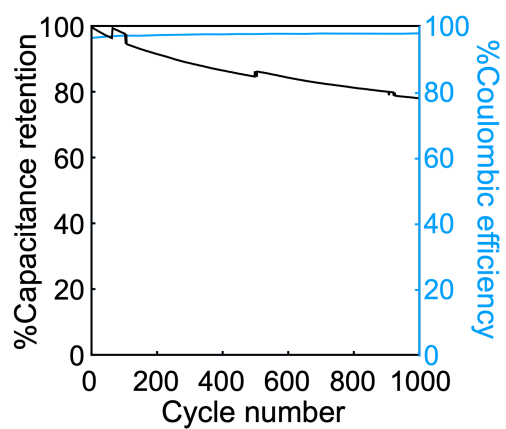

**Fig. S11** Cyclic performance and coulombic efficiency of the rGO gels at a current density of 5 A g<sup>-1</sup>.

#### Reference

- 1 M. L. Nelson and R. T. O'Connor, *J. Appl. Polym. Sci.*, 1964, **8**, 1311–1324.
